# Supplementary material
Source: publisher site journal article supplement (https://www.dovepress.com/article/478276)
Supplement: Supplementary file 1 [file get_supplementary_file.php]

**Supplementary material**

Engineered Biomimetic Nanoparticles-Mediated Targeting Delivery of Allicin against Myocardial Ischemia-Reperfusion Injury by Inhibiting Ferroptosis

Minghui Li†1, Jiabi Wu†1, Tao Yang1, Yuhang Zhao1, Ping Ren1, Lingling Chang2, Pilong Shi1, Jing Yang1, Yuhang Liu2, Xiaolei Li3, Peng Wang2*, Yonggang Cao1*

*1**Department of Pharmaceutics,* *Harbin Medical University, Heilongjiang 163319, China*

*2 Department of Physiology, Harbin Medical University, Heilongjiang 163319, China*

*3* *Department of Pathology, Jiangsu College of Nursing，Jiangsu 223003, China*

†These authors contributed equally to this work

*Corresponding author:

Peng Wang: wangpeng810122@126.com

Xinyang Road 39, Gaoxin District, Daqing, Heilongjiang, People’s Republic of China

Yonggang Cao: caoyonggang@hmudq.edu.cn

Xinyang Road 39, Gaoxin District, Daqing, Heilongjiang, People’s Republic of China

*Shear stress and analysis of shear adaptation*

Shear stress and analysis of shear adaptation were conducted. Briefly, CMECs were cultured under the condition of 10 dyn/cm2. Based on cell morphology and orientation, Photoshop CS7.0 was used to quantify shear adaptation from phase contrast images. The definition of full shear adapted was a majority of 60% of all cells oriented within equal or greater than 75% of the cells elongated (when their length-to-width ratio > 2) and an angle of ≤ 30°.

*Oxidative stress measurements*

To determine whether AL@MSNs@NM reduces oxidative stress, the enzymatic activities of superoxide dismutase (SOD), Mn-SOD, Cu/Zn-SOD, catalase (CAT), and glutathione peroxidase (GSH-PX), the level of glutathione (GSH) and malondialdehyde (MDA) were evaluated with different detection kits according to the manufacturer's instructions (Jian Cheng Bioengineering Institute, China).

*Cell death assays*

Cell death was assessed using the trypan blue exclusion method. In this assay, cells were stained with trypan blue, and the number of trypan blue-positive (dead) and trypan blue-negative (viable) cells were carefully counted using a haemocytometer.


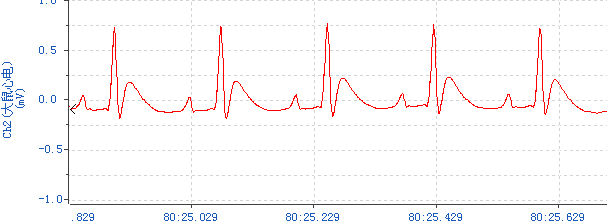

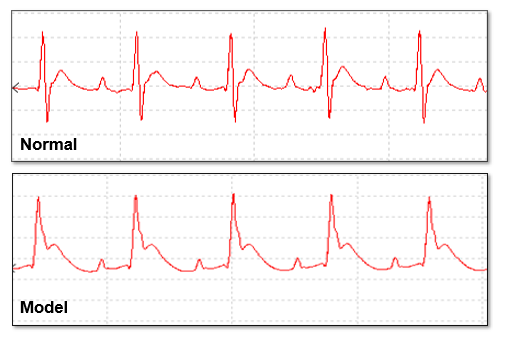


**AL@MSNs@NM**

**Supplementary Figure S1.** The electrocardiograms of normal and model and AL@MSNs@NM rat.


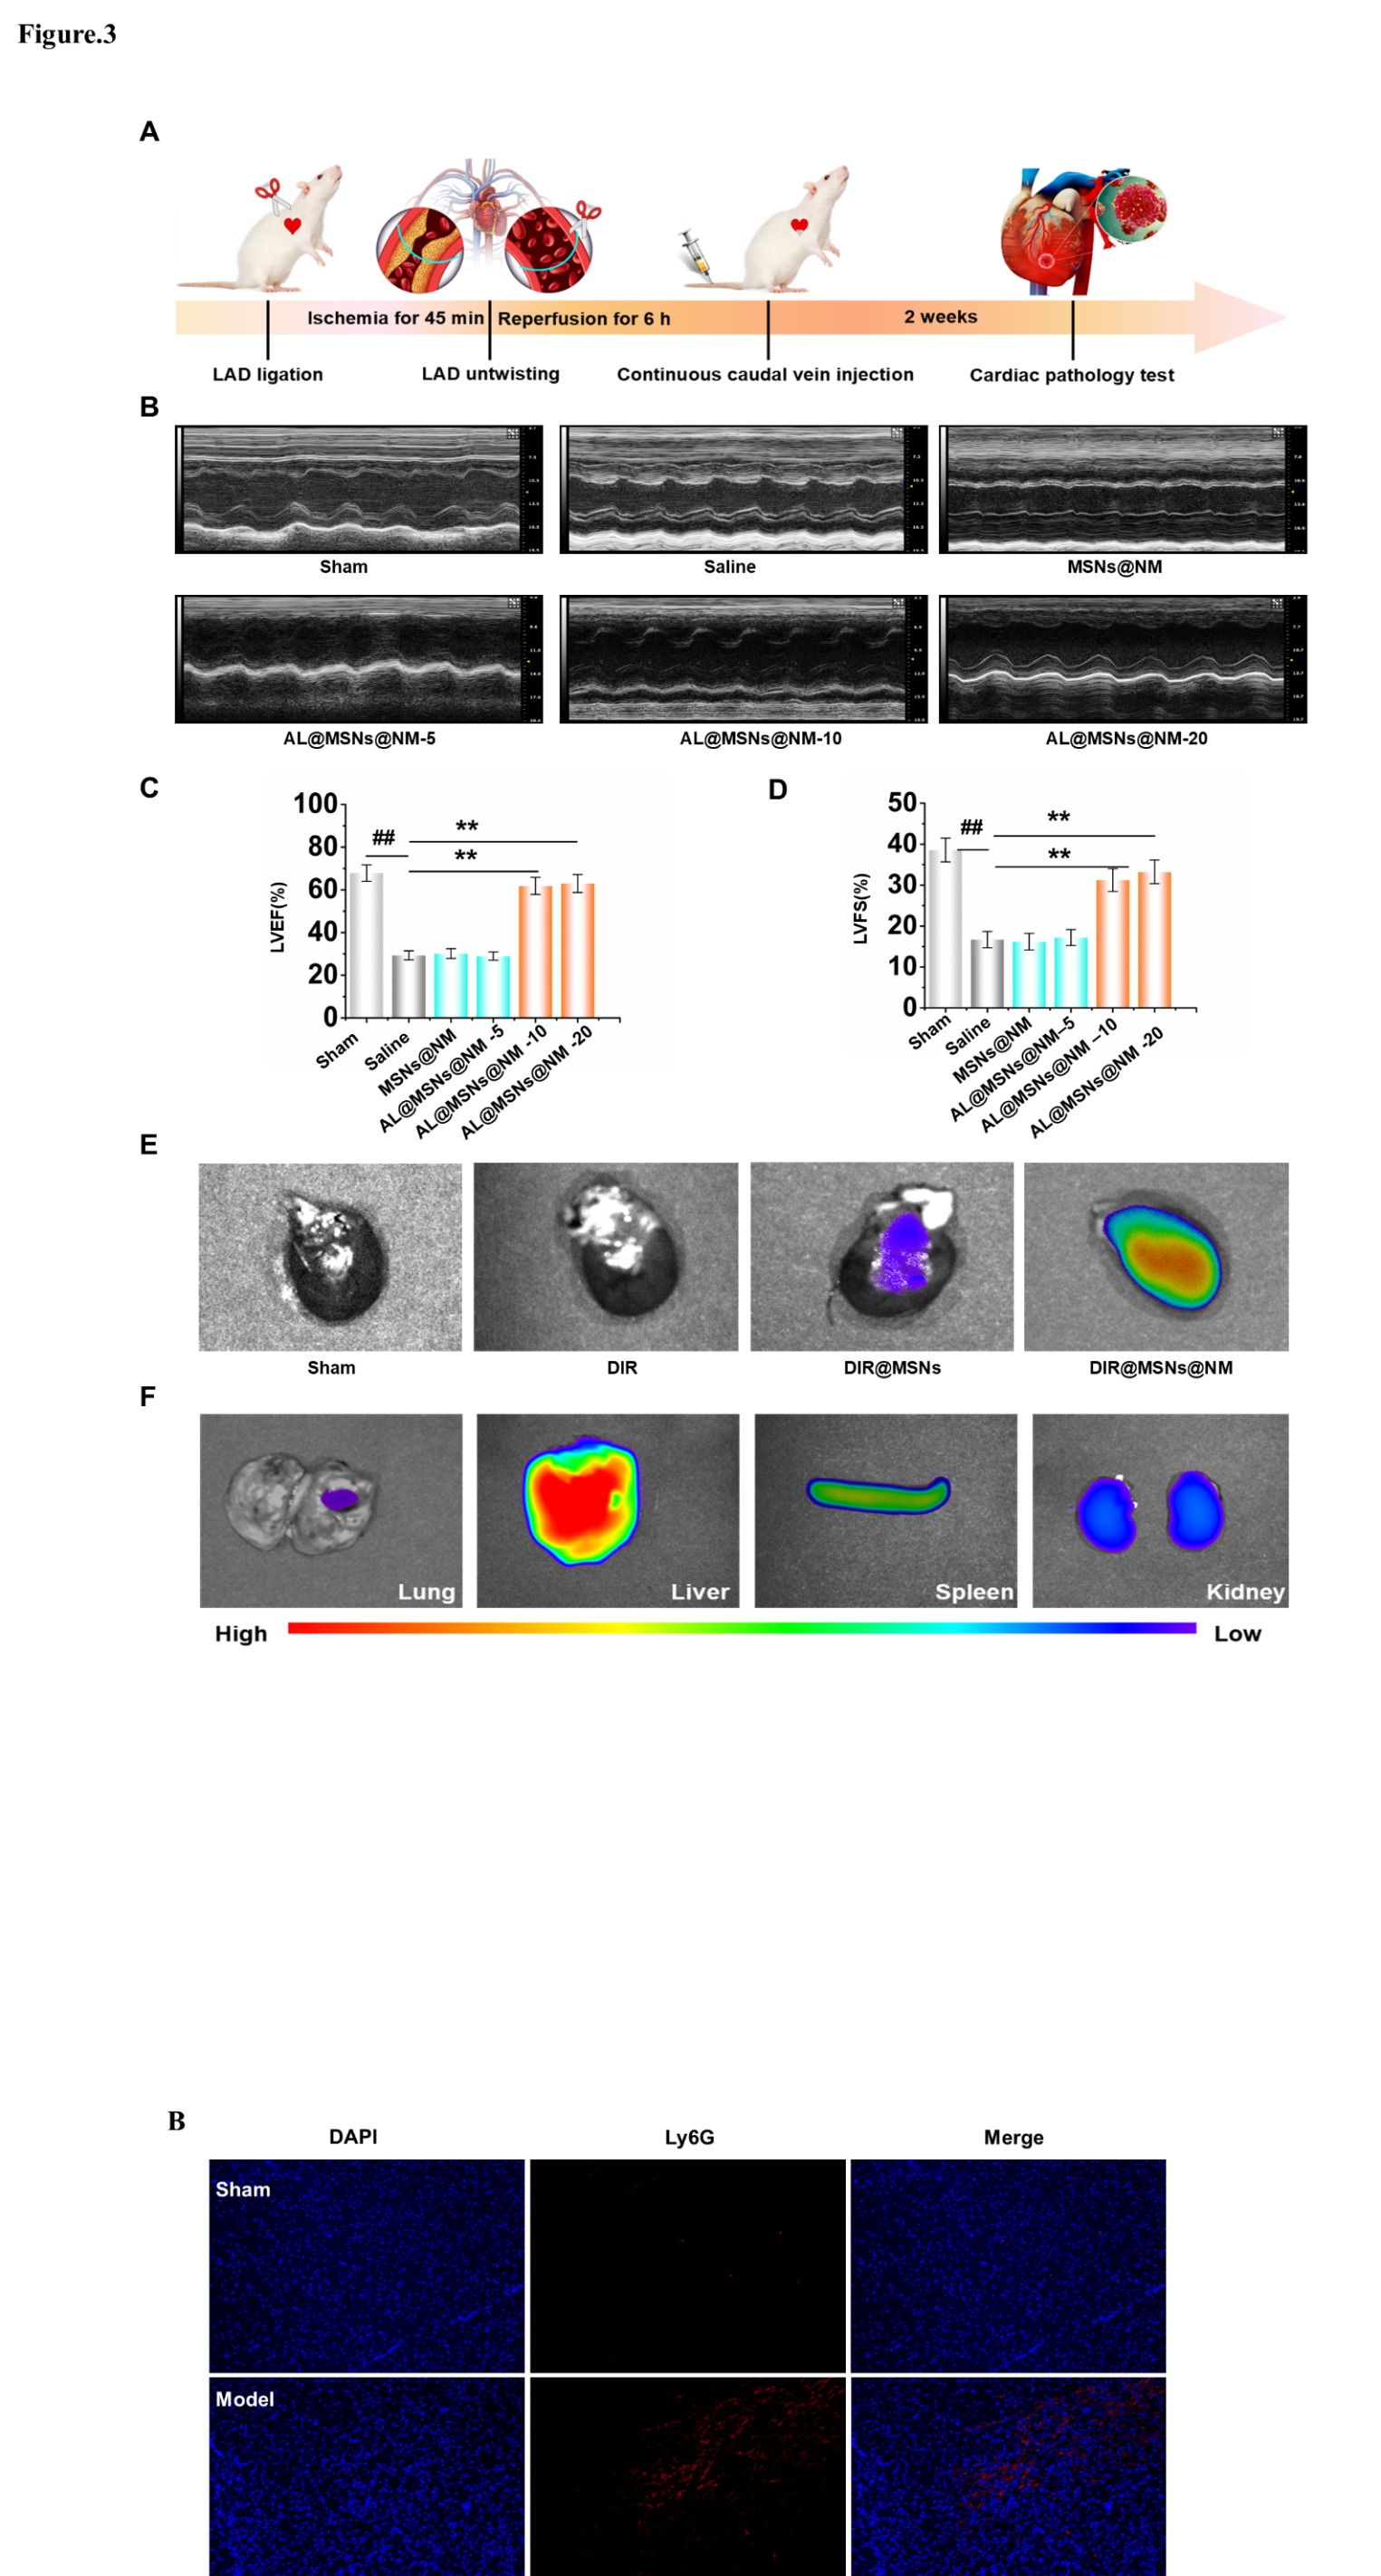


**Supplementary Figure S2.** Distribution of Ly6G-positive neutrophils was assessed by immunoﬂuorescence (red), and cell nuclei were identiﬁed using DAPI (blue).


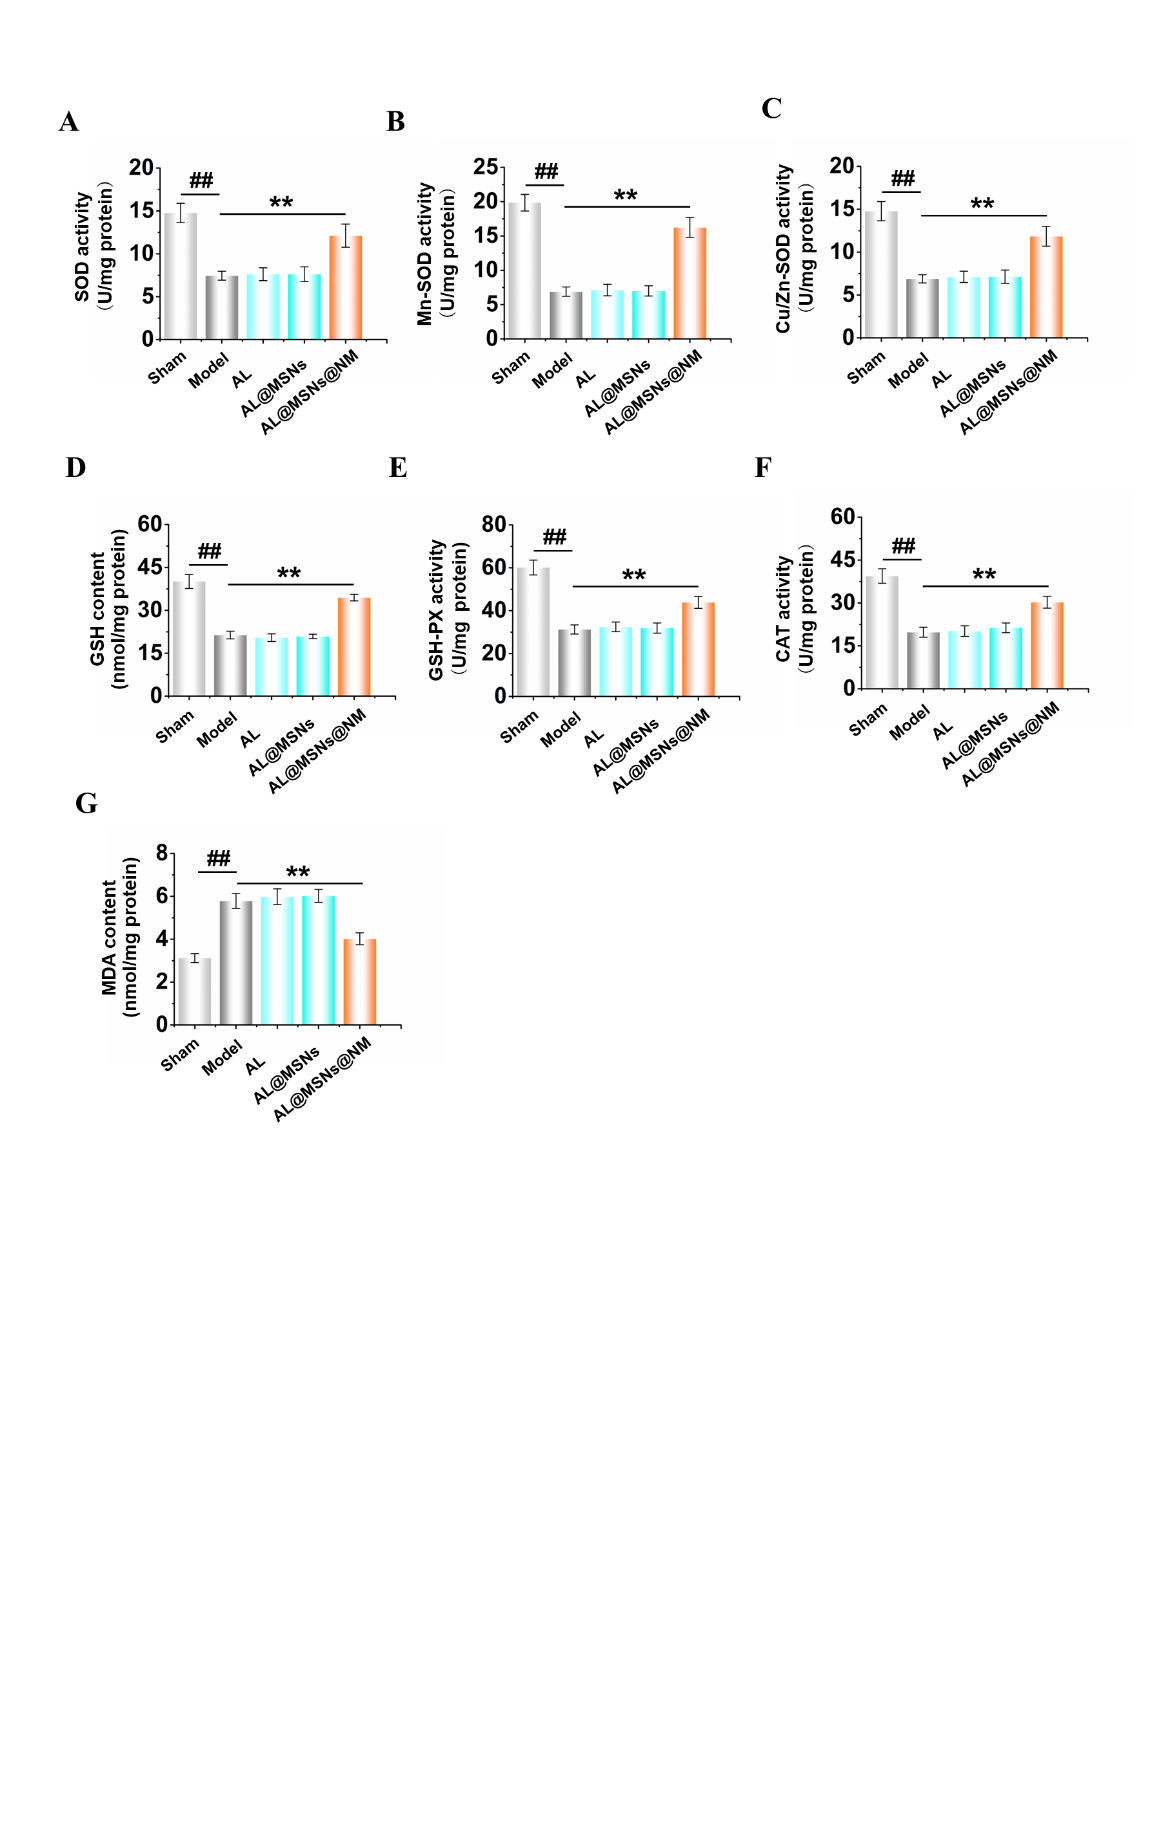


**Supplementary Figure S3.** (A-G) The activities of SOD, Mn-SOD, CuZn-SOD, GSH-PX, CAT, and levels of GSH and MDA were detected from the sham and model group, respectively.Data were represented by means ± SD (n=6). ##*P*<0.01 vs. sham group; ***P*<0.01 vs. model group.
